# Supplementary material for: Photoelectrocatalytic activity of flexible PEDOT–PSS/silicon carbide nanowire films
Source: Royal Society of Chemistry journal article supplement (doi:10.1039/c5ra19193a), 2015-01-01
Supplement: c5ra19193a1.pdf [file c5ra19193a1.pdf]

Supplementary Information For

**Photoelectrocatalytic activity of flexible PEDOT-PSS/silicon carbide nanowire films**

Xin Liao <sup>a</sup>, Zhaoxiang Liu <sup>a</sup>, Lijuan Ding <sup>a</sup>, Jianjun Chen <sup>a,b,\*</sup>, Weihua Tang <sup>c,\*</sup>

<sup>a</sup> Engineering Research Center for Eco-Dyeing & Finishing of Textiles, Ministry of Education, Zhejiang Sci-Tech University, Hangzhou 310018, China

<sup>b</sup> Department of Materials Forming and Control Engineering, College of Machinery and Automation, Zhejiang Sci-Tech University, Hangzhou 310018, China

<sup>c</sup> School of Science, Beijing University of Posts and Telecommunications, Beijing 100876, China

\* Corresponding author: E-mail: [chen@zstu.edu.cn](mailto:chen@zstu.edu.cn) (J.J. Chen); [whtang@bupt.edu.cn](mailto:whtang@bupt.edu.cn) (W.H. Tang); Tel: +86-571-86843265

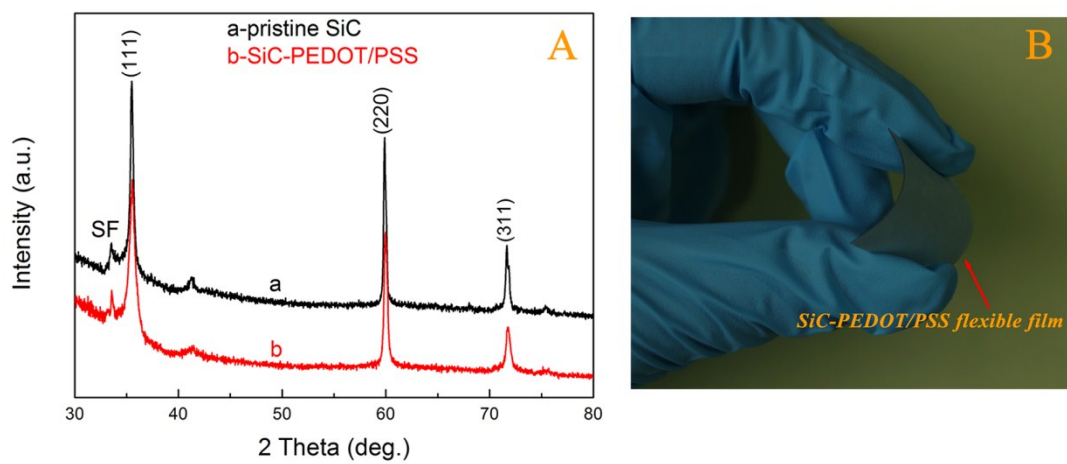

Fig. S1 XRD patterns (A) of the pristine SiC and the SiC-4.5 wt%-PEDOT/PSS film; the digital photo (B) of the SiC-PEDOT/PSS flexible film.

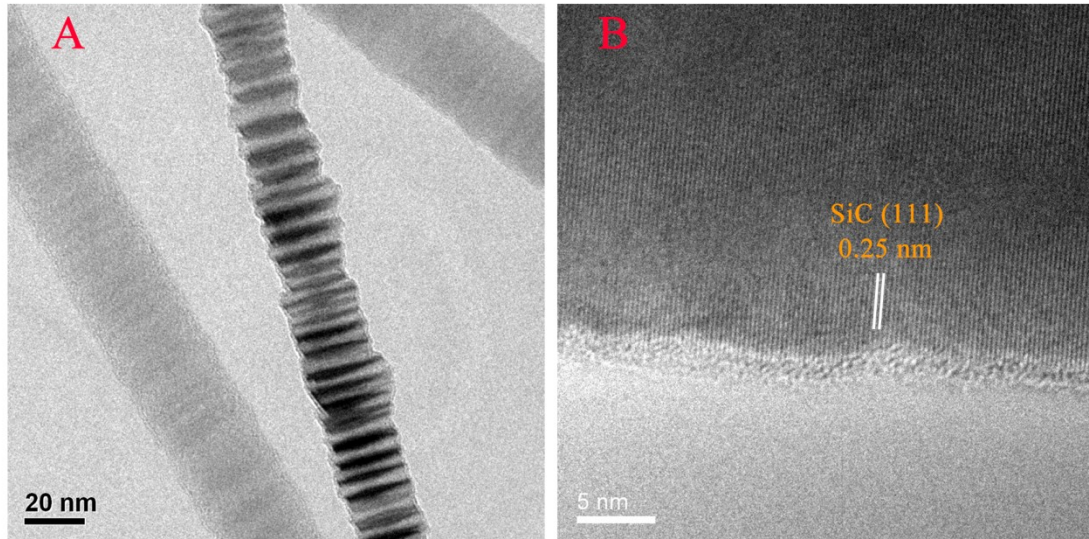

Fig. S2 TEM image (A) and HRTEM image (B) of the pristine SiC.

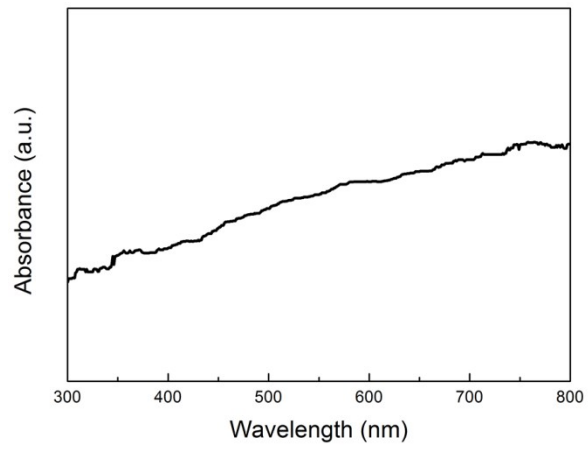

Fig. S3 UV-Vis spectra of the pristine PEDOT/PSS.

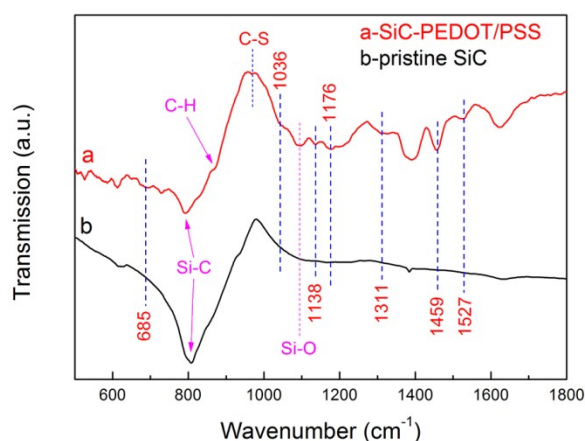

Fig. S4 FT-IR spectrum of the as-prepared SiC NWs (a) and the as-prepared SiC-4.5 wt%-PEDOT/PSS (b). The peak at about 800  $\text{cm}^{-1}$  can be corresponded to the Si-C stretching vibration.<sup>1</sup> Particularly, PSS is usually identified by sulfonate group with the vibrations at about 1036  $\text{cm}^{-1}$  and 1176  $\text{cm}^{-1}$ .<sup>2</sup> The bands at around 1138  $\text{cm}^{-1}$ , 1459  $\text{cm}^{-1}$  and 1527  $\text{cm}^{-1}$  are contributed from the stretching of ethylenedioxy group, the C=C symmetric and asymmetric stretching of the thiophene ring, respectively.<sup>3,4</sup> Additionally, the peaks appeared at 685  $\text{cm}^{-1}$  and 975  $\text{cm}^{-1}$  are attributed to the C-S bond, and the peak at 1311  $\text{cm}^{-1}$  is ascribed to the C-C stretching.<sup>2,5-6</sup> The inverted signal at about 900  $\text{cm}^{-1}$  is ascribed to the bending mode of C-H bond.<sup>7</sup>

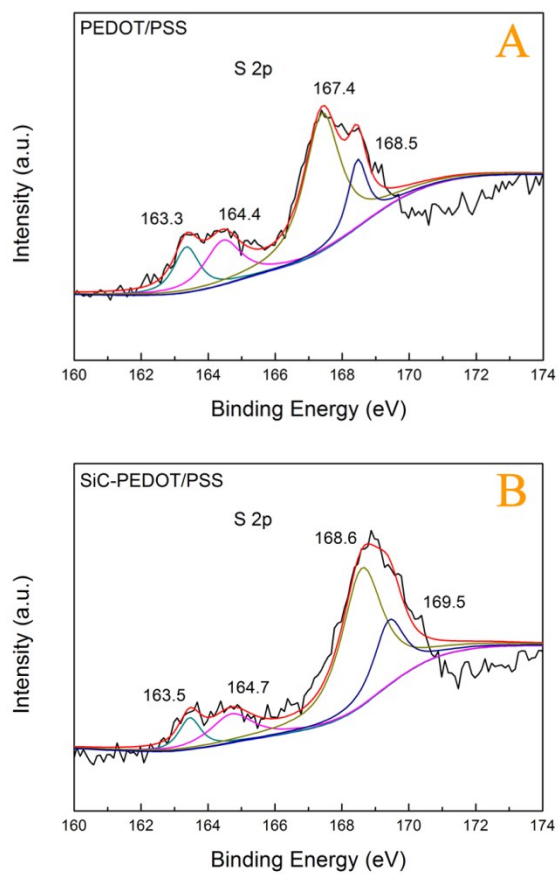

Fig. S5 XPS spectra of S 2p of the pristine PEDOT/PSS (A) and the SiC-4.5 wt%-PEDOT/PSS (B).

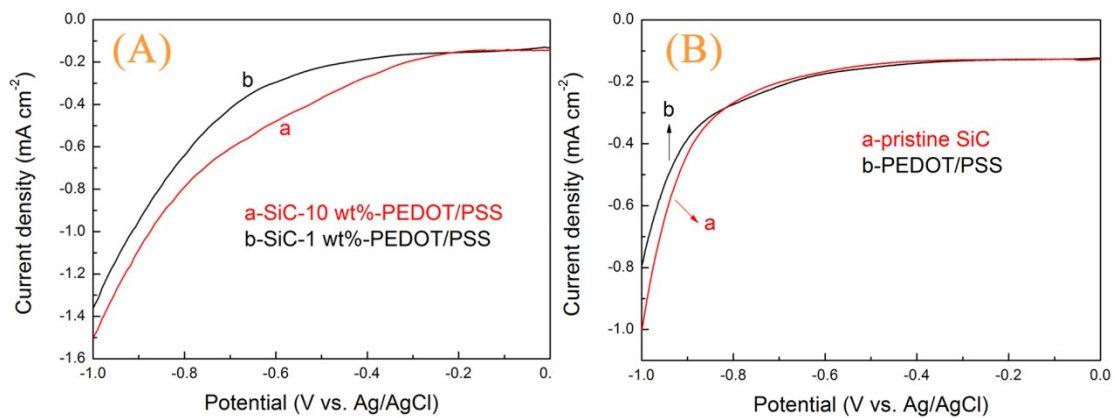

Fig. S6 Current density of SiC-PEDOT/PSS photoelectrodes (A), pristine SiC and PEDOT/PSS (B) under the simulated solar light in Na<sub>2</sub>S/Na<sub>2</sub>SO<sub>3</sub> electrolyte.

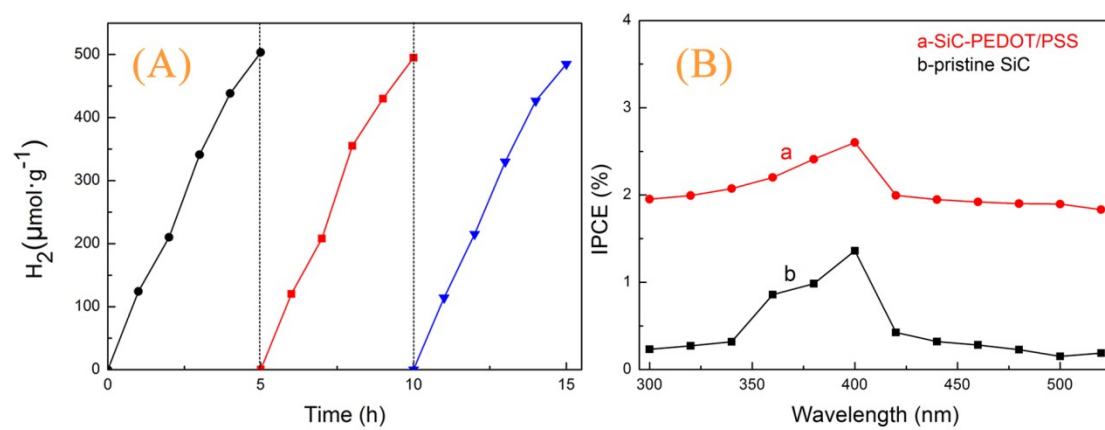

Fig. S7 (A) Recycling experiments of photocatalytic H<sub>2</sub> evolution using the SiC-4.5 wt%-PEDOT/PSS photocatalyst. (B) IPCE spectra for pristine SiC and SiC-4.5 wt%-PEDOT/PSS photoelectrodes.



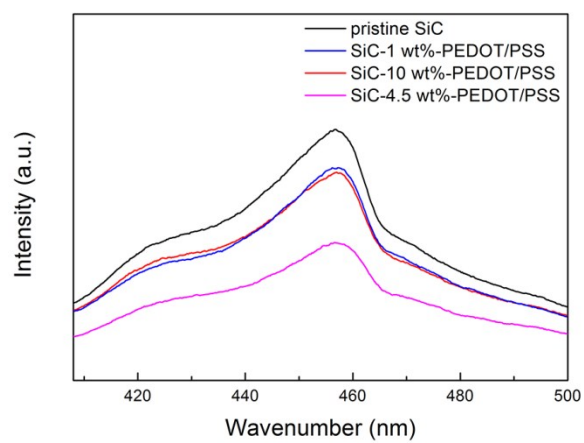

Fig. S8 PL spectra of the pristine SiC (black line), SiC-1 wt%-PEDOT/PSS (blue line), SiC-10 wt%-PEDOT/PSS (red line) and SiC-4.5 wt%-PEDOT/PSS (magenta line).

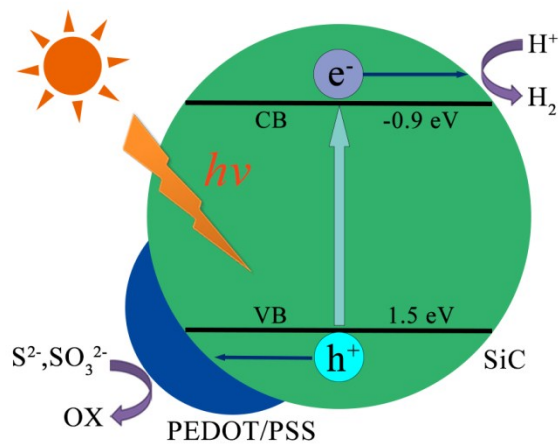

Fig. S9 Schematic illustration of the photoexcited charge-transfer process on the SiC-PEDOT/PSS photocatalyst.

## References

1. J. Y. Hao, Y. Y. Wang, X. L. Tong, G. Q. Jin and X. Y. Guo, *Int. J. Hydrogen Energy*, 2012, **37**, 15038–15044.
2. B. Friedel, P. E. Keivanidis, T. J. Brenner, A. Abrusci, C. R. McNeill, R. H. Friend and N. C. Greenham, *Macromolecules*, 2009, **42**, 6741–6747.
3. S. Garreau, G. Louarn, J. P. Buisson, G. Froyer and S. Lefrant, *Macromolecules*, 1999, **32**, 6807–6812.
4. W. C. Chen, C. L. Liu, C. T. Yen, F. C. Tsai, C. J. Tonzola, N. Olson and S. A. Jenekhe, *Macromolecules*, 2004, **37**, 5959–5964.
5. Y. Xia, K. Sun and J. Ouyang, *Adv. Mater.*, 2012, **24**, 2436–2440.
6. N. Srinivasan, Y. Shiga, D. Atarashi, E. Sakai and M. Miyauchi, *Appl. Catal. B-Environ.*, 2015, **179**, 113–121.
7. D. Han, G. Yang, J. Song, L. Niu and A. Ivaska, *J. Electroanal. Chem.*, 2007, **602**, 24–28.
